# Supplementary material for: Genome-Wide Identification of Molecular Mimicry Candidates in Parasites
Source: PLoS One. 2011 Mar 8;6(3):e17546. doi: 10.1371/journal.pone.0017546 (PMC3050887; doi:10.1371/journal.pone.0017546)
Supplement: Table S2 — Molecular mimicry candidates identified searching the human proteome with fragmented protein sequences from parasites. Hits are sorted according to GO (gene ontology) process annotation of the respective human target protein. Enrichment (‘Enrich’) of GO terms in the identified sets of target proteins is expressed in relation to the abundance of the same GO terms in the complete human proteome (last three columns). (XLS) [file pone.0017546.s005.xls]

## Sheet: Sheet1
		B. malayi			C. parvum			G. lamblia			L. major			P. falciparum			S. mansoni			T. cruzi			T. vaginalis			H. sapiens
		#Hits	%Hits	Enrich.	#Hits	%Hits	Enrich.	#Hits	%Hits	Enrich.	#Hits	%Hits	Enrich.	#Hits	%Hits	Enrich.	#Hits	%Hits	Enrich.	#Hits	%Hits	Enrich.	#Hits	%Hits	Enrich.	#Hits	%Hits	Enrich.
GO:0000003	Reproduction	0	0	0	0	0	0	1	0.27027	13.6997	0	0	0	0	0	0	0	0	0	0	0	0	0	0	0	9	0.0197282	1
GO:0001906	Cell killing	0	0	0	1	0.286533	4.21666	0	0	0	1	0.0925926	1.3626	0	0	0	0	0	0	0	0	0	0	0	0	31	0.0679527	1
GO:0002376	Immune system process	2	0.638978	0.295941	8	2.29226	1.06166	7	1.89189	0.876224	19	1.75926	0.814796	8	1.75824	0.814325	7	1.54185	0.714104	27	1.65441	0.766236	14	1.7284	0.800501	985	2.15914	1
GO:0007587	Sugar utilization	0	0	0	0	0	0	0	0	0	0	0	0	0	0	0	0	0	0	0	0	0	0	0	0	1	0.00219202	1
GO:0008152	Metabolic process	39	12.4601	0.955502	43	12.3209	0.944831	40	10.8108	0.829029	122	11.2963	0.866258	53	11.6484	0.893256	45	9.91189	0.760095	193	11.826	0.906877	95	11.7284	0.899394	5949	13.0403	1
GO:0008283	Cell proliferation	2	0.638978	0.695708	4	1.14613	1.24789	4	1.08108	1.17706	8	0.740741	0.806506	5	1.0989	1.19646	4	0.881057	0.95928	8	0.490196	0.533717	7	0.864198	0.940923	419	0.918457	1
GO:0009987	Cellular process	68	21.7252	1.12562	73	20.9169	1.08374	75	20.2703	1.05023	227	21.0185	1.089	91	20	1.03623	91	20.0441	1.03851	330	20.2206	1.04766	181	22.3457	1.15776	8805	19.3007	1
GO:0015976	Carbon utilization	0	0	0	0	0	0	0	0	0	0	0	0	0	0	0	0	0	0	0	0	0	0	0	0	1	0.00219202	1
GO:0016032	Viral reproduction	0	0	0	0	0	0	0	0	0	0	0	0	0	0	0	0	0	0	0	0	0	0	0	0	16	0.0350723	1
GO:0016043	Cellular component organization	27	8.6262	2.07885	27	7.73639	1.86442	20	5.40541	1.30267	68	6.2963	1.51736	29	6.37363	1.536	20	4.40529	1.06164	107	6.55637	1.58004	54	6.66667	1.60662	1893	4.1495	1
GO:0016265	Death	3	0.958466	0.696262	7	2.00573	1.45703	6	1.62162	1.178	22	2.03704	1.47977	7	1.53846	1.11759	10	2.20264	1.60007	37	2.26716	1.64694	12	1.48148	1.0762	628	1.37659	1
GO:0022414	Reproductive process	4	1.27796	0.762096	5	1.43266	0.854355	8	2.16216	1.28938	19	1.75926	1.04912	7	1.53846	0.917446	8	1.76211	1.05082	25	1.53186	0.913511	10	1.23457	0.736222	765	1.6769	1
GO:0022610	Biological adhesion	14	4.47284	2.89024	10	2.86533	1.85151	8	2.16216	1.39714	17	1.57407	1.01713	7	1.53846	0.994116	13	2.86344	1.85028	34	2.08333	1.3462	18	2.22222	1.43595	706	1.54757	1
GO:0023046	Signaling process	9	2.8754	0.517051	14	4.01146	0.721336	19	5.13514	0.923393	39	3.61111	0.649345	12	2.63736	0.474247	20	4.40529	0.792153	73	4.47304	0.804336	49	6.04938	1.08779	2537	5.56116	1
GO:0023052	Signaling	11	3.51438	0.587274	18	5.15759	0.861866	18	4.86486	0.812949	56	5.18519	0.866477	18	3.95604	0.66108	28	6.1674	1.03061	89	5.45343	0.911302	48	5.92593	0.990259	2730	5.98422	1
GO:0032501	Multicellular organismal process	16	5.11182	0.88535	15	4.29799	0.744398	19	5.13514	0.889388	60	5.55556	0.962204	25	5.49451	0.95163	31	6.82819	1.18262	88	5.39216	0.933904	40	4.93827	0.855292	2634	5.77378	1
GO:0032502	Developmental process	26	8.30671	1.28328	24	6.87679	1.06237	23	6.21622	0.960324	87	8.05556	1.24448	32	7.03297	1.0865	41	9.03084	1.39515	129	7.90441	1.22113	46	5.67901	0.877333	2953	6.47304	1
GO:0040007	Growth	5	1.59744	3.89708	2	0.573066	1.39804	1	0.27027	0.659344	4	0.37037	0.903545	4	0.879121	2.14468	2	0.440529	1.0747	8	0.490196	1.19587	0	0	0	187	0.409908	1
GO:0040011	Locomotion	2	0.638978	0.751293	2	0.573066	0.673796	1	0.27027	0.317777	7	0.648148	0.762075	1	0.21978	0.258412	5	1.10132	1.2949	12	0.735294	0.864539	3	0.37037	0.435472	388	0.850504	1
GO:0043473	Pigmentation	0	0	0	0	0	0	0	0	0	1	0.0925926	1.28002	0	0	0	0	0	0	2	0.122549	1.69415	0	0	0	33	0.0723367	1
GO:0044085	Cellular component biogenesis	0	0	0	0	0	0	1	0.27027	2.3711	2	0.185185	1.62464	2	0.43956	3.8563	0	0	0	1	0.0612745	0.537566	0	0	0	52	0.113985	1
GO:0048511	Rhythmic process	2	0.638978	2.17539	1	0.286533	0.975495	2	0.540541	1.84026	1	0.0925926	0.315229	0	0	0	3	0.660793	2.24965	7	0.428922	1.46025	0	0	0	134	0.293731	1
GO:0050896	Response to stimulus	17	5.43131	0.71098	21	6.01719	0.787674	27	7.2973	0.955244	57	5.27778	0.690882	36	7.91209	1.03572	25	5.50661	0.720836	105	6.43382	0.842212	43	5.30864	0.694922	3485	7.63919	1
GO:0051179	Localization	3	0.958466	2.60269	2	0.573066	1.55615	1	0.27027	0.733912	3	0.277778	0.754299	4	0.879121	2.38723	1	0.220264	0.598123	2	0.122549	0.332779	3	0.37037	1.00573	168	0.36826	1
GO:0051234	Establishment of localization	12	3.83387	0.72035	14	4.01146	0.753719	24	6.48649	1.21875	52	4.81481	0.904662	24	5.27473	0.991075	17	3.74449	0.703558	73	4.47304	0.840445	44	5.4321	1.02064	2428	5.32223	1
GO:0051704	Multi-organism process	2	0.638978	0.416431	4	1.14613	0.74695	6	1.62162	1.05683	18	1.66667	1.08619	7	1.53846	1.00264	6	1.32159	0.861296	20	1.22549	0.798669	8	0.987654	0.643668	700	1.53441	1
GO:0065007	Biological regulation	49	15.655	1.02274	54	15.4728	1.01084	59	15.9459	1.04175	190	17.5926	1.14933	83	18.2418	1.19174	77	16.9604	1.10802	262	16.0539	1.0488	135	16.6667	1.08883	6983	15.3069	1
